# Supplementary material for: Barriers and Facilitators to the Adoption of Mobile Health Among Health Care Professionals From the United Kingdom: Discrete Choice Experiment
Source: PubMed Central journal article supplement (PMC7381009; doi:10.2196/17704), 2020-07-06

SUPPLEMENTARY FIGURE 2

Scenario 1/16

|                                                      | Option A                 | Option B                 | I wouldn't prescribe either |
|------------------------------------------------------|--------------------------|--------------------------|-----------------------------|
| Number of studies concerning safety or effectiveness | 0                        | 3                        |                             |
| Does the app have an NHS stamp of approval?          | No                       | Yes                      |                             |
| Cost to the NHS                                      | £75                      | £0                       |                             |
| You have used the app yourself                       | Yes                      | No                       |                             |
| Age of the patient                                   | 75                       | 18                       |                             |
| The app has been recommended by other clinicians     | Yes                      | No                       |                             |
| <b>I choose....</b>                                  | <input type="checkbox"/> | <input type="checkbox"/> | <input type="checkbox"/>    |

Scenario 2/16

|                                                      | Option A                 | Option B                 | I wouldn't prescribe either |
|------------------------------------------------------|--------------------------|--------------------------|-----------------------------|
| Number of studies concerning safety or effectiveness | 2                        | 1                        |                             |
| Does the app have an NHS stamp of approval?          | Yes                      | No                       |                             |
| Cost to the NHS                                      | £75                      | £0                       |                             |
| You have used the app yourself                       | No                       | Yes                      |                             |
| Age of the patient                                   | 18                       | 75                       |                             |
| The app has been recommended by other clinicians     | Yes                      | No                       |                             |
| <b>I choose....</b>                                  | <input type="checkbox"/> | <input type="checkbox"/> | <input type="checkbox"/>    |

Scenario 3/16

|                                                      | Option A                 | Option B                 | I wouldn't prescribe either |
|------------------------------------------------------|--------------------------|--------------------------|-----------------------------|
| Number of studies concerning safety or effectiveness | 1                        | 2                        |                             |
| Does the app have an NHS stamp of approval?          | No                       | Yes                      |                             |
| Cost to the NHS                                      | £5                       | £25                      |                             |
| You have used the app yourself                       | No                       | Yes                      |                             |
| Age of the patient                                   | 35                       | 55                       |                             |
| The app has been recommended by other clinicians     | Yes                      | No                       |                             |
| <b>I choose....</b>                                  | <input type="checkbox"/> | <input type="checkbox"/> | <input type="checkbox"/>    |

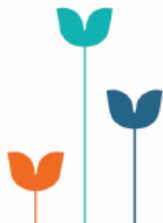

Supplement: mhealth_v8i7e17704_app3.pdf [file mhealth_v8i7e17704_app3.pdf]
