# Supplementary material for: Barriers and Facilitators to the Adoption of Mobile Health Among Health Care Professionals From the United Kingdom: Discrete Choice Experiment
Source: PubMed Central journal article supplement (PMC7381009; doi:10.2196/17704), 2020-07-06
Supplement: mhealth_v8i7e17704_app1.pdf [file mhealth_v8i7e17704_app1.pdf]

APPENDIX 1: SEARCH TERMS FOR LITERATURE REVIEW

**MEDLINE Search: Searched 16th September 2019**

|           |                            |           |                        |
|-----------|----------------------------|-----------|------------------------|
| <b>1</b>  | mHealth                    | <b>18</b> | perception*            |
| <b>2</b>  | eHealth                    | <b>19</b> | belief*                |
| <b>3</b>  | m-health                   | <b>20</b> | attitude*              |
| <b>4</b>  | mobile health              | <b>21</b> | <i>OR/ 13-20</i>       |
| <b>5</b>  | smartphone app*            | <b>22</b> | doctor*                |
| <b>6</b>  | digital health             | <b>23</b> | nurse*                 |
| <b>7</b>  | cellphone app*             | <b>24</b> | healthcare provider*   |
| <b>8</b>  | cell phone app*            | <b>25</b> | health-care provider*  |
| <b>9</b>  | health-app*                | <b>26</b> | clinician*             |
| <b>10</b> | health app                 | <b>27</b> | physician*             |
| <b>11</b> | digital technolog*         | <b>28</b> | GP*                    |
| <b>12</b> | <i>OR/ 1-11</i>            | <b>29</b> | general practitioner   |
| <b>13</b> | discrete choice experiment | <b>30</b> | general practice       |
| <b>14</b> | discrete-choice experiment | <b>31</b> | professionals          |
| <b>15</b> | conjoint analysis          | <b>32</b> | <i>OR/ 22-31</i>       |
| <b>16</b> | stated preference          | <b>33</b> | <i>AND/ 12, 21, 32</i> |
| <b>17</b> | preference*                |           |                        |
