# Supplementary material for: Barriers and Facilitators to the Adoption of Mobile Health Among Health Care Professionals From the United Kingdom: Discrete Choice Experiment
Source: PubMed Central journal article supplement (PMC7381009; doi:10.2196/17704), 2020-07-06
Supplement: mhealth_v8i7e17704_app2.pdf [file mhealth_v8i7e17704_app2.pdf]

SUPPLEMENTARY FIGURE 1

Please rank the following attributes from **1 (most important)** to **9 (least important)** in influencing your decisions to prescribe a health-app to patients

| Attribute                                                                                                                     | Ranking (1 most important, 9 least important) |
|-------------------------------------------------------------------------------------------------------------------------------|-----------------------------------------------|
| The app has an NHS stamp of approval, CE mark or other indicator of quality assessment                                        |                                               |
| There are published studies demonstrating the safety/effectiveness of the app                                                 |                                               |
| The cost of the app                                                                                                           |                                               |
| Having access to appropriate IT for app testing/demonstrating (including internet, devices)                                   |                                               |
| You have used/checked the app yourself                                                                                        |                                               |
| The app has been created by a clinician/health professional or clinical body                                                  |                                               |
| The app is easy to prescribe (It is listed in EMIS/System One)                                                                |                                               |
| The app has been recommended by other clinicians/royal college/clinical network                                               |                                               |
| Unmet need in the condition the app is designed to treat (e.g. long waiting lists with mental health, lack of follow-up care) |                                               |
